# Supplementary material for: Complementary Feeding Practices: Recommendations of Pediatricians for Infants with and without Allergy Risk
Source: MDPI journal article supplement (doi:10.3390/nu16020239), 2024-01-12
Supplement: s1 [file s1]

## Supplement

### Supplementary Table S1

#### Demographic characteristics of the study participants

|                     | Total (n=233) |
|---------------------|---------------|
| <u>Sex</u>          |               |
| Male                | 56 (24%)      |
| Female              | 177 (76%)     |
| <u>Experience</u>   |               |
| Low                 | 112 (48%)     |
| High                | 121 (52%)     |
| Years of experience | 15 (6.5-24)   |
| <u>Subspecialty</u> |               |
| No                  | 174 (75%)     |
| Yes                 | 59 (25%)      |
| <u>Subspecialty</u> |               |
| No                  | 173 (74%)     |
| Neonatology         | 22 (9%)       |
| Allergology         | 8 (3%)        |
| Pulmonology         | 8 (3%)        |
| Infectious disease  | 2 (1%)        |
| Intensive care      | 6 (3%)        |
| Developmental       | 3 (1.5%)      |
| Gastroenterology    | 1 (0.5%)      |
| Puberty             | 2 (1%)        |
| Hematology          | 3 (1.5%)      |
| Immunology          | 1 (0.5%)      |
| Homeopathy          | 1 (0.5%)      |
| Endocrinology       | 1 (0.5%)      |
| Breastfeeding       | 3 (1.5%)      |
| <u>Location</u>     |               |
| Rural               | 129 (55%)     |
| Urban               | 104 (45%)     |

|                                           |           |
|-------------------------------------------|-----------|
| <u>Place of work</u>                      |           |
| Abroad                                    | 5 (2%)    |
| Attica                                    | 65 (28%)  |
| Macedonia                                 | 38 (16%)  |
| Epirus                                    | 6 (3%)    |
| Central Greece                            | 15 (7%)   |
| Island                                    | 17 (7%)   |
| The Peloponnese                           | 7 (3%)    |
| Thrace                                    | 2 (1%)    |
| Cyprus                                    | 3 (1.5%)  |
| Ped. Hospital                             | 29 (12%)  |
| Private Practice                          | 37 (16%)  |
| University                                | 1 (0.5%)  |
| n/a                                       | 8 (3%)    |
| <u>Parentship</u>                         |           |
| No                                        | 33 (14%)  |
| Yes                                       | 200 (86%) |
| No of Children                            | 2 (1-2)   |
| Healthy-children waiting period_Low       |           |
| High                                      | 126 (54%) |
|                                           | 107 (46%) |
| Healthy-children waiting period duration  | 2 (2-3)   |
| Allergic-children waiting period          |           |
| Low                                       | 24 (10%)  |
| High                                      | 209 (90%) |
| Allergic-children waiting period duration | 5 (3-6)   |

**Supplementary Table S2 Age of Introduction of Solid Food as Recommended by the Pediatricians**

|                         | Total (N=233) |  |                             |            |
|-------------------------|---------------|--|-----------------------------|------------|
| VitD                    | 0 (0-0)       |  | Potato                      | 6 (5-6)    |
| Probiotics              | 0 (0-2)       |  | Corn                        | 6 (6-8)    |
| N3                      | 12 (7.5-18)   |  | Peas                        | 6 (6-7)    |
| Multivitamins           | 18 (12-18)    |  | White rice                  | 6 (5-6)    |
| VitA                    | 18 (12-18)    |  | Whole-grain rice            | 6 (5-7)    |
| VitC                    | 18 (12-18)    |  | Oat                         | 6 (6-7)    |
| Iron                    | 4 (0-6)       |  | Whole-wheat products        | 7 (6-8)    |
| Olive oil               | 6 (5-6)       |  | White-wheat products        | 7 (6-7)    |
| Butter                  | 12 (10-15)    |  | Trahanas frumenty           | 7 (6-8)    |
| Olives                  | 12 (10-12)    |  | Baby biscuits without sugar | 8 (7-12)   |
| Seed oils               | 12 (12-18)    |  | Baby biscuits with sugar    | 13 (12-18) |
| Margarine               | 12 (12-18)    |  | Gluten-free oat             | 6 (5-7)    |
| Almonds                 | 9 (8-12)      |  | Carrot                      | 6 (5-6)    |
| Walnuts                 | 9 (8-12)      |  | Zucchini                    | 6 (5-6)    |
| Sunflower/pumpkin seeds | 10 (8-14)     |  | Green leafy vegetables      | 6 (5-6)    |
| Pistachios              | 10 (8-15)     |  | Cabbage                     | 6 (5-6)    |
| Peanuts                 | 10 (8-15)     |  | Cauliflower                 | 6 (5-6)    |
| Hazelnuts               | 10 (8-12)     |  | Tomato                      | 6 (5-7)    |
| Cashew nuts             | 10 (8-15)     |  | Beetroot                    | 6 (5-7)    |
| Sesame                  | 10 (8-12)     |  | Spinach                     | 6 (5-7)    |
| Almond butter           | 9 (7-12)      |  | Pepper                      | 6 (5-7)    |
| Hazelnut butter         | 9 (7-12)      |  | Eggplant                    | 6 (5-7)    |
| Peanut butter           | 9 (7-12)      |  | Pear                        | 5 (5-6)    |
| Tahini                  | 10 (8-12)     |  | Apple                       | 5 (5-6)    |
| Cod                     | 9 (8-11)      |  | Banana                      | 5 (5-6)    |
| Anchovy                 | 10 (8-12)     |  | Orange                      | 6 (5-7)    |
| Dover sole              | 9 (7-10)      |  | Kiwi                        | 6 (6-8)    |
| Sardine                 | 10 (8-12)     |  | Pomegranate                 | 7 (6-8)    |
| Sea bass                | 9 (8-11)      |  | Mandarin                    | 6 (6-7)    |
| Hake                    | 9 (7-10)      |  | Apricot                     | 6 (5-6)    |
| Calamari                | 12 (10-13)    |  | Cherry                      | 6 (6-7)    |
| Salmon                  | 11 (8-12)     |  | Peach/nectarine             | 6 (5-7)    |
| Octopus                 | 12 (10-14)    |  | Raisins                     | 9 (6-12)   |
| Shrimps                 | 12 (9-13)     |  | Grapes                      | 6 (6-8)    |
| Mussels                 | 12 (10-18)    |  | Strawberry                  | 8 (6-12)   |
| Canned tuna             | 13 (12-18)    |  | Fresh orange juice          | 8 (6-10)   |
| Beans                   | 8 (7-11)      |  | Fresh berries               | 7 (6-10)   |
| Lentils                 | 8 (7-10)      |  | Fig                         | 7 (6-11)   |
| Chickpeas               | 8 (7-10)      |  | Fresh mixed fruit juice     | 10 (7-12)  |
| Fava                    | 8 (7-11)      |  | Watermelon                  | 6 (6-7)    |
| Hard-boiled egg         | 8 (7-11)      |  | Melon                       | 6 (6-7)    |
| Omelet or egg eye       | 11 (9-12)     |  | Dried berries               | 10 (7-12)  |
| Raw egg                 | 13 (11-18)    |  | Dried apricots              | 9 (6-12)   |
| Egg-lemon sauce         | 12 (9-12)     |  | Dried dates                 | 8 (6-12)   |
| Cow milk                | 12 (12-13)    |  | Dried figs                  | 10 (7-12)  |
| Goat milk               | 12 (12-13)    |  | Boiled food                 | 6 (5-6)    |
| Cow-milk yogurt         | 8 (7-12)      |  | Family food without salt    | 12 (9-12)  |
| Traditional yogurt      | 8 (7-12)      |  | Family food with salt       | 13 (12-18) |
| Sheep-milk yogurt       | 8 (7-12)      |  | Baby-led weaning            | 8 (6-12)   |
| Drained yogurt          | 9 (7-12)      |  | Mashed food                 | 6 (5-6)    |
| Fruit yogurt            | 9 (7-12)      |  | Fork-mashed food            | 9 (8-10)   |

|                                   |            |  |                       |            |
|-----------------------------------|------------|--|-----------------------|------------|
| Kids' yogurt                      | 7 (6-8)    |  | Food in pieces        | 10 (9-12)  |
| Cottage cheese                    | 11 (8-12)  |  | Roasted food          | 12 (9-12)  |
| Cream cheese                      | 12 (8-12)  |  | Family food with salt | 13 (12-18) |
| Manouri cheese                    | 9 (7-12)   |  | Fried food            | 12 (12-18) |
| Katiki cheese                     | 12 (8-12)  |  | Sugar sweets          | 15 (12-18) |
| Feta cheese                       | 12 (10-12) |  | Honey                 | 12 (12-13) |
| Kasari/graviera/kefalotyri cheese | 12 (10-13) |  | Salt                  | 12 (12-18) |
| Gouda cheese                      | 12 (9-12)  |  | Spices                | 12 (8-13)  |
| Sour cream                        | 13 (12-18) |  | Ready meals in jar    | 12 (8-13)  |
| Ariani                            | 12 (10-13) |  |                       |            |
| Kefir                             | 12 (8-12)  |  |                       |            |
| Chicken                           | 6 (6-6)    |  |                       |            |
| Rabbit                            | 7 (6-8)    |  |                       |            |
| Lamb                              | 7 (6-8)    |  |                       |            |
| Beef                              | 6 (6-6)    |  |                       |            |
| Pork                              | 10 (7-12)  |  |                       |            |
| Hare or wild boar                 | 9 (7-12)   |  |                       |            |
| Birds                             | 9 (7-12)   |  |                       |            |
| Liver                             | 9 (7-12)   |  |                       |            |
| Cold cuts/salami/ham              | 18 (12-18) |  |                       |            |

**Supplementary Table S3: Differences based on location of practice**

|                                   | <b>Semi-urban or rural<br/>(N = 129)</b> | <b>Urban<br/>(N = 104)</b> | <b>p-value</b> |
|-----------------------------------|------------------------------------------|----------------------------|----------------|
| Rabbit                            | 6 (6-8)                                  | 7 (6-8)                    | 0.02           |
| Kaseri/graviera/kefalotyri cheese | 12 (11-14)                               | 12 (10-12)                 | 0.04           |
| Ariani                            | 12 (9-12)                                | 12 (12-14)                 | 0.04           |
| Hazelnuts                         | 9 (7-12)                                 | 12 (9-13)                  | 0.03           |
| Hazelnut butter                   | 9 (7-11)                                 | 10 (8-12)                  | 0.04           |
| Iron supplement                   | 3 (0-6)                                  | 4 (4-6)                    | 0.04           |

**Supplementary Table S4: Differences based on parenthood**

| <b>Food</b>          | <b>Total<br/>(N=233)</b> | <b>No<br/>(N=33)</b> | <b>Yes<br/>(N=200)</b> | <b>p</b> |
|----------------------|--------------------------|----------------------|------------------------|----------|
| Cherry               | 6 (6-7)                  | 6 (6-7)              | 6 (6-7)                | 0.04     |
| Fresh orange juice   | 8 (6-10)                 | 8 (6-10)             | 7 (6-11)               | 0.02     |
| Whole-wheat products | 7 (6-8)                  | 7 (6-8)              | 7 (6-7)                | 0.008    |
| White-wheat products | 7 (6-7)                  | 7 (6-7)              | 7 (6-7)                | 0.02     |
| Cottage cheese       | 11 (8-12)                | 10 (8-12)            | 12 (8-12)              | 0.023    |
| Mussels              | 12 (10-18)               | 12 (10-18)           | 12 (10-15)             | 0.04     |
| Baby-led weaning     | 8 (6-12)                 | 7 (6-12)             | 8 (6-12)               | 0.003    |
| Fork-mashed food     | 9 (8-10)                 | 9 (8-10)             | 9 (8-10)               | 0.04     |

**Supplementary Table S5**

DEPENDENT VARIABLE: ALMONDS/ALMOND BUTTER

INDEPENDENT VARIABLE: SEX, EXPERIENCE, SUBSPECIALTY, LOCATION, PARENTHSHIP

|                     |                     | Variables in the Equation |      |        |    |      |        | 95% C.I. for<br>EXP(B) |       |
|---------------------|---------------------|---------------------------|------|--------|----|------|--------|------------------------|-------|
|                     |                     | B                         | S.E. | Wald   | df | Sig. | Exp(B) | Lower                  | Upper |
| Step 1 <sup>a</sup> | SEX(1)              | .721                      | .516 | 1.952  | 1  | .162 | 2.056  | .748                   | 5.654 |
|                     | EXPERIENCE(1)       | -1.471                    | .503 | 8.558  | 1  | .003 | .230   | .086                   | .616  |
|                     | SUBSPECIALTY<br>(1) | -1.505                    | .399 | 14.191 | 1  | .000 | .222   | .102                   | .486  |
|                     | LOCATION(1)         | -.836                     | .407 | 4.210  | 1  | .040 | .434   | .195                   | .963  |
|                     | PARENTHSHIP(1)      | .848                      | .678 | 1.563  | 1  | .211 | 2.334  | .618                   | 8.812 |

a. Variable(s) entered on step 1: SEX, EXPERIENCE, SUBSPECIALTY, LOCATION, PARENTHSHIP.

DEPENDENT VARIABLE: WALNUTS

INDEPENDENT VARIABLE: SEX, EXPERIENCE, SUBSPECIALTY, LOCATION, PARENTHSHIP

|                     |                     | Variables in the Equation |      |       |    |      |        | 95% C.I. for<br>EXP(B) |       |
|---------------------|---------------------|---------------------------|------|-------|----|------|--------|------------------------|-------|
|                     |                     | B                         | S.E. | Wald  | df | Sig. | Exp(B) | Lower                  | Upper |
| Step 1 <sup>a</sup> | SEX(1)              | .696                      | .461 | 2.277 | 1  | .131 | 2.006  | .812                   | 4.954 |
|                     | EXPERIENCE(1)       | -.649                     | .400 | 2.624 | 1  | .105 | .523   | .238                   | 1.146 |
|                     | SUBSPECIALTY<br>(1) | -.901                     | .353 | 6.519 | 1  | .011 | .406   | .203                   | .811  |
|                     | LOCATION(1)         | -.735                     | .367 | 4.016 | 1  | .045 | .480   | .234                   | .984  |
|                     | PARENTHSHIP(1)      | .372                      | .602 | .382  | 1  | .537 | 1.451  | .446                   | 4.724 |

a. Variable(s) entered on step 1: SEX, EXPERIENCE, SUBSPECIALTY, LOCATION, PARENTHSHIP.

DEPENDENT VARIABLE: PISTACHIOS

INDEPENDENT VARIABLE: SEX, EXPERIENCE, SUBSPECIALTY, LOCATION, PARENTHSHIP

|                     |                 | Variables in the Equation |      |       |    |      |        |                     |       |
|---------------------|-----------------|---------------------------|------|-------|----|------|--------|---------------------|-------|
|                     |                 | B                         | S.E. | Wald  | df | Sig. | Exp(B) | 95% C.I. for EXP(B) |       |
|                     |                 |                           |      |       |    |      |        | Lower               | Upper |
| Step 1 <sup>a</sup> | SEX(1)          | -.010                     | .519 | .000  | 1  | .985 | .990   | .358                | 2.736 |
|                     | EXPERIENCE(1)   | -.867                     | .413 | 4.406 | 1  | .036 | .420   | .187                | .944  |
|                     | SUBSPECIALTY(1) | -.353                     | .379 | .869  | 1  | .351 | .703   | .334                | 1.476 |
|                     | LOCATION(1)     | -.402                     | .372 | 1.165 | 1  | .280 | .669   | .322                | 1.388 |
|                     | PARENTHSHIP(1)  | .231                      | .663 | .122  | 1  | .727 | 1.260  | .344                | 4.621 |

a. Variable(s) entered on step 1: SEX, EXPERIENCE, SUBSPECIALTY, LOCATION, PARENTHSHIP.

DEPENDENT VARIABLE: PEANUTS/PEANUT BUTTER

INDEPENDENT VARIABLE: SEX, EXPERIENCE, SUBSPECIALTY, LOCATION, PARENTHSHIP

|                     |                 | Variables in the Equation |      |        |    |      |        |                     |       |
|---------------------|-----------------|---------------------------|------|--------|----|------|--------|---------------------|-------|
|                     |                 | B                         | S.E. | Wald   | df | Sig. | Exp(B) | 95% C.I. for EXP(B) |       |
|                     |                 |                           |      |        |    |      |        | Lower               | Upper |
| Step 1 <sup>a</sup> | SEX(1)          | -.503                     | .522 | .928   | 1  | .335 | .605   | .217                | 1.683 |
|                     | EXPERIENCE(1)   | -1.521                    | .450 | 11.412 | 1  | .001 | .218   | .090                | .528  |
|                     | SUBSPECIALTY(1) | -.339                     | .365 | .866   | 1  | .352 | .712   | .349                | 1.456 |
|                     | LOCATION(1)     | -.716                     | .367 | 3.799  | 1  | .051 | .489   | .238                | 1.004 |
|                     | PARENTHSHIP(1)  | .245                      | .632 | .150   | 1  | .699 | 1.277  | .370                | 4.407 |

a. Variable(s) entered on step 1: SEX, EXPERIENCE, SUBSPECIALTY, LOCATION, PARENTHSHIP.

DEPENDENT VARIABLE: SESAME/TAHINI

INDEPENDENT VARIABLE: SEX, EXPERIENCE, SUBSPECIALTY, LOCATION, PARENTHSHIP

|                     |                     | Variables in the Equation |      |        |    |      | 95% C.I. for EXP(B) |       |       |
|---------------------|---------------------|---------------------------|------|--------|----|------|---------------------|-------|-------|
|                     |                     | B                         | S.E. | Wald   | df | Sig. | Exp(B)              | Lower | Upper |
| Step 1 <sup>a</sup> | SEX(1)              | -1.002                    | .594 | 2.847  | 1  | .092 | .367                | .115  | 1.176 |
|                     | EXPERIENCE(1)       | -1.861                    | .494 | 14.204 | 1  | .000 | .156                | .059  | .409  |
|                     | SUBSPECIALTY<br>(1) | -.359                     | .377 | .907   | 1  | .341 | .698                | .334  | 1.462 |
|                     | LOCATION(1)         | -.765                     | .380 | 4.062  | 1  | .044 | .465                | .221  | .979  |
|                     | PARENTHSHIP(1)      | .197                      | .703 | .079   | 1  | .779 | 1.218               | .307  | 4.826 |

a. Variable(s) entered on step 1: SEX, EXPERIENCE, SUBSPECIALTY, LOCATION, PARENTHSHIP.

DEPENDENT VARIABLE: HAZELNUT BUTTER

INDEPENDENT VARIABLE: SEX, EXPERIENCE, SUBSPECIALTY, LOCATION, PARENTHSHIP

|                     |                     | Variables in the Equation |      |       |    |      | 95% C.I. for EXP(B) |       |        |
|---------------------|---------------------|---------------------------|------|-------|----|------|---------------------|-------|--------|
|                     |                     | B                         | S.E. | Wald  | df | Sig. | Exp(B)              | Lower | Upper  |
| Step 1 <sup>a</sup> | SEX(1)              | -1.473                    | .803 | 3.364 | 1  | .067 | .229                | .047  | 1.106  |
|                     | EXPERIENCE(1)       | -1.158                    | .533 | 4.715 | 1  | .030 | .314                | .110  | .893   |
|                     | SUBSPECIALTY(<br>1) | -.524                     | .473 | 1.228 | 1  | .268 | .592                | .234  | 1.496  |
|                     | LOCATION(1)         | -1.105                    | .482 | 5.260 | 1  | .022 | .331                | .129  | .852   |
|                     | PARENTHSHIP(1)      | .842                      | .761 | 1.224 | 1  | .269 | 2.321               | .522  | 10.314 |

a. Variable(s) entered on step 1: SEX, EXPERIENCE, SUBSPECIALTY, LOCATION, PARENTHSHIP.

DEPENDENT VARIABLE: SEAFOOD

INDEPENDENT VARIABLE: SEX, EXPERIENCE, SUBSPECIALTY, LOCATION, PARENTHSHIP

**Variables in the Equation**



|                     |                     | B       | S.E.     | Wald  | df | Sig. | Exp(B) | 95% C.I. for EXP(B) |       |
|---------------------|---------------------|---------|----------|-------|----|------|--------|---------------------|-------|
|                     |                     |         |          |       |    |      |        | Lower               | Upper |
| Step 1 <sup>a</sup> | SEX(1)              | -18.234 | 4990.962 | .000  | 1  | .997 | .000   | .000                | .     |
|                     | EXPERIENCE(1)       | -18.360 | 3530.094 | .000  | 1  | .996 | .000   | .000                | .     |
|                     | SUBSPECIALTY<br>(1) | -2.305  | .746     | 9.553 | 1  | .002 | .100   | .023                | .430  |
|                     | LOCATION(1)         | -2.705  | 1.037    | 6.801 | 1  | .009 | .067   | .009                | .511  |
|                     | PARENTHSHIP(1)      | -15.098 | 6209.920 | .000  | 1  | .998 | .000   | .000                | .     |

DEPENDENT VARIABLE: CALAMARI

|                     |                 | Variables in the Equation |      |        |    |      |        |                     |       |
|---------------------|-----------------|---------------------------|------|--------|----|------|--------|---------------------|-------|
|                     |                 | B                         | S.E. | Wald   | df | Sig. | Exp(B) | 95% C.I. for EXP(B) |       |
|                     |                 |                           |      |        |    |      |        | Lower               | Upper |
| Step 1 <sup>a</sup> | SEX(1)          | -.286                     | .542 | .279   | 1  | .598 | .751   | .259                | 2.174 |
|                     | EXPERIENCE(1)   | -1.686                    | .428 | 15.509 | 1  | .000 | .185   | .080                | .429  |
|                     | SUBSPECIALTY(1) | .239                      | .389 | .376   | 1  | .540 | 1.270  | .592                | 2.722 |
|                     | LOCATION(1)     | -.268                     | .368 | .529   | 1  | .467 | .765   | .372                | 1.574 |
|                     | PARENTHSHIP(1)  | .065                      | .618 | .011   | 1  | .917 | 1.067  | .318                | 3.581 |

DEPENDENT VARIABLE: BEANS

| Variables in the Equation |      |      |    |      |        | 95% C.I. for EXP(B) |       |
|---------------------------|------|------|----|------|--------|---------------------|-------|
| B                         | S.E. | Wald | df | Sig. | Exp(B) | Lower               | Upper |

|                     |                 |        |       |        |   |      |       |      |        |
|---------------------|-----------------|--------|-------|--------|---|------|-------|------|--------|
| Step 1 <sup>a</sup> | SEX(1)          | -.951  | .793  | 1.440  | 1 | .230 | .386  | .082 | 1.826  |
|                     | EXPERIENCE(1)   | -1.756 | .669  | 6.900  | 1 | .009 | .173  | .047 | .640   |
|                     | SUBSPECIALTY(1) | -1.446 | .464  | 9.715  | 1 | .002 | .236  | .095 | .585   |
|                     | LOCATION(1)     | -1.814 | .567  | 10.247 | 1 | .001 | .163  | .054 | .495   |
|                     | PARENTHSHIP(1)  | .110   | 1.134 | .009   | 1 | .923 | 1.116 | .121 | 10.303 |

a. Variable(s) entered on step 1: SEX, EXPERIENCE, SUBSPECIALTY, LOCATION, PARENTHSHIP.

DEPENDENT VARIABLE: LENTILS

INDEPENDENT VARIABLE: SEX, EXPERIENCE, SUBSPECIALTY, LOCATION, PARENTHSHIP

| Variables in the Equation |                 |         |          |        |    |      |        | 95% C.I. for<br>EXP(B) |       |
|---------------------------|-----------------|---------|----------|--------|----|------|--------|------------------------|-------|
|                           |                 | B       | S.E.     | Wald   | df | Sig. | Exp(B) | Lower                  | Upper |
| Step 1 <sup>a</sup>       | SEX(1)          | -.784   | 1.164    | .453   | 1  | .501 | .457   | .047                   | 4.473 |
|                           | EXPERIENCE(1)   | -18.582 | 3657.451 | .000   | 1  | .996 | .000   | .000                   | .     |
|                           | SUBSPECIALTY(1) | -2.440  | .762     | 10.253 | 1  | .001 | .087   | .020                   | .388  |
|                           | LOCATION(1)     | -2.646  | 1.043    | 6.432  | 1  | .011 | .071   | .009                   | .548  |
|                           | PARENTHSHIP(1)  | -15.796 | 6377.711 | .000   | 1  | .998 | .000   | .000                   | .     |

a. Variable(s) entered on step 1: SEX, EXPERIENCE, SUBSPECIALTY, LOCATION, PARENTHSHIP.

DEPENDENT VARIABLE: HARD-BOILED EGG

INDEPENDENT VARIABLE: SEX, EXPERIENCE, SUBSPECIALTY, LOCATION, PARENTHSHIP

| Variables in the Equation |        |      |      |      |    |      |        | 95% C.I. for<br>EXP(B) |       |
|---------------------------|--------|------|------|------|----|------|--------|------------------------|-------|
|                           |        | B    | S.E. | Wald | df | Sig. | Exp(B) | Lower                  | Upper |
| Step 1 <sup>a</sup>       | SEX(1) | .077 | .364 | .045 | 1  | .832 | 1.081  | .529                   | 2.207 |

|                     |       |      |       |   |      |      |      |       |
|---------------------|-------|------|-------|---|------|------|------|-------|
| EXPERIENCE(1)       | -.622 | .311 | 4.011 | 1 | .045 | .537 | .292 | .987  |
| SUBSPECIALTY<br>(1) | -.576 | .269 | 4.588 | 1 | .032 | .562 | .332 | .952  |
| LOCATION(1)         | -.445 | .281 | 2.502 | 1 | .114 | .641 | .369 | 1.112 |
| PARENTHSHIP(1)      | -.629 | .584 | 1.159 | 1 | .282 | .533 | .170 | 1.675 |

a. Variable(s) entered on step 1: SEX, EXPERIENCE, SUBSPECIALTY, LOCATION, PARENTHSHIP.

DEPENDENT VARIABLE: OMELETTE OR EGG EYE

INDEPENDENT VARIABLE: SEX, EXPERIENCE, SUBSPECIALTY, LOCATION, PARENTHSHIP

| Variables in the Equation |                     |       |      |       |    |      |        | 95% C.I. for<br>EXP(B) |       |
|---------------------------|---------------------|-------|------|-------|----|------|--------|------------------------|-------|
|                           |                     | B     | S.E. | Wald  | df | Sig. | Exp(B) | Lower                  | Upper |
| Step 1 <sup>a</sup>       | SEX(1)              | .662  | .430 | 2.367 | 1  | .124 | 1.939  | .834                   | 4.506 |
|                           | EXPERIENCE(1)       | -.455 | .324 | 1.969 | 1  | .161 | .634   | .336                   | 1.198 |
|                           | SUBSPECIALTY<br>(1) | .912  | .321 | 8.104 | 1  | .004 | 2.490  | 1.329                  | 4.668 |
|                           | LOCATION(1)         | -.235 | .312 | .571  | 1  | .450 | .790   | .429                   | 1.455 |
|                           | PARENTHSHIP(1)      | .673  | .576 | 1.365 | 1  | .243 | 1.960  | .634                   | 6.062 |

a. Variable(s) entered on step 1: SEX, EXPERIENCE, SUBSPECIALTY, LOCATION, PARENTHSHIP.

DEPENDENT VARIABLE: COW-MILK YOGURT

INDEPENDENT VARIABLE: SEX, EXPERIENCE, SUBSPECIALTY, LOCATION, PARENTHSHIP

| Variables in the Equation |        |      |      |      |    |      |        | 95% C.I. for EXP(B) |       |
|---------------------------|--------|------|------|------|----|------|--------|---------------------|-------|
|                           |        | B    | S.E. | Wald | df | Sig. | Exp(B) | Lower               | Upper |
| Step 1 <sup>a</sup>       | SEX(1) | .093 | .441 | .044 | 1  | .833 | 1.097  | .462                | 2.606 |

|  |                     |       |      |       |   |      |       |      |       |
|--|---------------------|-------|------|-------|---|------|-------|------|-------|
|  | EXPERIENCE(1)       | -.843 | .363 | 5.398 | 1 | .020 | .431  | .211 | .876  |
|  | SUBSPECIALTY<br>(1) | -.530 | .333 | 2.528 | 1 | .112 | .589  | .306 | 1.131 |
|  | LOCATION(1)         | .218  | .337 | .417  | 1 | .518 | 1.243 | .642 | 2.407 |
|  | PARENTHSHIP(1)      | -.320 | .576 | .308  | 1 | .579 | .726  | .235 | 2.246 |

a. Variable(s) entered on step 1: SEX, EXPERIENCE, SUBSPECIALTY, LOCATION, PARENTHSHIP.

DEPENDENT VARIABLE: COW MILK

INDEPENDENT VARIABLE: SEX, EXPERIENCE, SUBSPECIALTY, LOCATION, PARENTHSHIP

|                     |                     | Variables in the Equation |      |       |    |      |        | 95% C.I. for<br>EXP(B) |       |
|---------------------|---------------------|---------------------------|------|-------|----|------|--------|------------------------|-------|
|                     |                     | B                         | S.E. | Wald  | df | Sig. | Exp(B) | Lower                  | Upper |
| Step 1 <sup>a</sup> | SEX(1)              | -.391                     | .375 | 1.090 | 1  | .296 | .676   | .324                   | 1.409 |
|                     | EXPERIENCE(1)       | -.458                     | .308 | 2.205 | 1  | .138 | .633   | .346                   | 1.158 |
|                     | SUBSPECIALTY<br>(1) | -.165                     | .288 | .329  | 1  | .566 | .848   | .482                   | 1.491 |
|                     | LOCATION(1)         | -.055                     | .294 | .035  | 1  | .852 | .946   | .531                   | 1.686 |
|                     | PARENTHSHIP(1)      | -1.337                    | .656 | 4.157 | 1  | .041 | .263   | .073                   | .950  |

a. Variable(s) entered on step 1: SEX, EXPERIENCE, SUBSPECIALTY, LOCATION, PARENTHSHIP.

DEPENDENT VARIABLE: CREAM CHEESE

INDEPENDENT VARIABLE: SEX, EXPERIENCE, SUBSPECIALTY, LOCATION, PARENTHSHIP

|                     |               | Variables in the Equation |      |      |    |      |        | 95% C.I. for<br>EXP(B) |       |
|---------------------|---------------|---------------------------|------|------|----|------|--------|------------------------|-------|
|                     |               | B                         | S.E. | Wald | df | Sig. | Exp(B) | Lower                  | Upper |
| Step 1 <sup>a</sup> | SEX(1)        | -.444                     | .497 | .799 | 1  | .371 | .642   | .242                   | 1.698 |
|                     | EXPERIENCE(1) | .140                      | .417 | .113 | 1  | .737 | 1.151  | .508                   | 2.605 |

|                     |      |      |       |   |      |       |       |       |
|---------------------|------|------|-------|---|------|-------|-------|-------|
| SUBSPECIALTY<br>(1) | .828 | .379 | 4.756 | 1 | .029 | 2.288 | 1.087 | 4.812 |
| LOCATION(1)         | .495 | .370 | 1.795 | 1 | .180 | 1.641 | .795  | 3.387 |
| PARENTHSHIP(1)      | .047 | .652 | .005  | 1 | .942 | 1.049 | .292  | 3.763 |

a. Variable(s) entered on step 1: SEX, EXPERIENCE, SUBSPECIALTY, LOCATION, PARENTHSHIP.

DEPENDENT VARIABLE: GOUDA CHEESE

INDEPENDENT VARIABLE: SEX, EXPERIENCE, SUBSPECIALTY, LOCATION, PARENTHSHIP

|                     |                     | Variables in the Equation |      |       |    |      |        | 95% C.I. for EXP(B) |       |
|---------------------|---------------------|---------------------------|------|-------|----|------|--------|---------------------|-------|
|                     |                     | B                         | S.E. | Wald  | df | Sig. | Exp(B) | Lower               | Upper |
| Step 1 <sup>a</sup> | SEX(1)              | -1.423                    | .636 | 5.010 | 1  | .025 | .241   | .069                | .838  |
|                     | EXPERIENCE(1)       | -.316                     | .373 | .715  | 1  | .398 | .729   | .351                | 1.516 |
|                     | SUBSPECIALTY(<br>1) | -.695                     | .335 | 4.297 | 1  | .038 | .499   | .259                | .963  |
|                     | LOCATION(1)         | -.478                     | .343 | 1.937 | 1  | .164 | .620   | .316                | 1.215 |
|                     | PARENTHSHIP(1)      | -.372                     | .687 | .293  | 1  | .589 | .690   | .179                | 2.650 |

a. Variable(s) entered on step 1: SEX, EXPERIENCE, SUBSPECIALTY, LOCATION, PARENTHSHIP.

DEPENDENT VARIABLE: WHEAT PRODUCTS

INDEPENDENT VARIABLE: SEX, EXPERIENCE, SUBSPECIALTY, LOCATION, PARENTHSHIP

|                     |                     | Variables in the Equation |      |       |    |      |        | 95% C.I. for EXP(B) |       |
|---------------------|---------------------|---------------------------|------|-------|----|------|--------|---------------------|-------|
|                     |                     | B                         | S.E. | Wald  | df | Sig. | Exp(B) | Lower               | Upper |
| Step 1 <sup>a</sup> | SEX(1)              | -1.893                    | .762 | 6.175 | 1  | .013 | .151   | .034                | .670  |
|                     | EXPERIENCE(1)       | -1.027                    | .381 | 7.279 | 1  | .007 | .358   | .170                | .755  |
|                     | SUBSPECIALTY(<br>1) | -.626                     | .321 | 3.811 | 1  | .051 | .535   | .285                | 1.003 |
|                     | LOCATION(1)         | -.648                     | .339 | 3.644 | 1  | .056 | .523   | .269                | 1.017 |
|                     | PARENTHSHIP(1)      | 1.186                     | .537 | 4.884 | 1  | .027 | 3.274  | 1.144               | 9.373 |

a. Variable(s) entered on step 1: SEX, EXPERIENCE, SUBSPECIALTY, LOCATION, PARENTHSHIP.

DEPENDENT VARIABLE: TRAHANAS

INDEPENDENT VARIABLE: SEX, EXPERIENCE, SUBSPECIALTY, LOCATION, PARENTHSHIP

|                     |                 | Variables in the Equation |      |       |    |      |        | 95% C.I. for EXP(B) |       |
|---------------------|-----------------|---------------------------|------|-------|----|------|--------|---------------------|-------|
|                     |                 | B                         | S.E. | Wald  | df | Sig. | Exp(B) | Lower               | Upper |
| Step 1 <sup>a</sup> | SEX(1)          | -.494                     | .374 | 1.741 | 1  | .187 | .610   | .293                | 1.271 |
|                     | EXPERIENCE(1)   | -.661                     | .291 | 5.146 | 1  | .023 | .516   | .292                | .914  |
|                     | SUBSPECIALTY(1) | .027                      | .264 | .010  | 1  | .920 | 1.027  | .612                | 1.724 |
|                     | LOCATION(1)     | -.015                     | .265 | .003  | 1  | .954 | .985   | .586                | 1.655 |
|                     | PARENTHSHIP(1)  | .468                      | .464 | 1.016 | 1  | .314 | 1.597  | .643                | 3.966 |

a. Variable(s) entered on step 1: SEX, EXPERIENCE, SUBSPECIALTY, LOCATION, PARENTHSHIP.

DEPENDENT VARIABLE: TOMATO

INDEPENDENT VARIABLE: SEX, EXPERIENCE, SUBSPECIALTY, LOCATION, PARENTHSHIP

|                     |                 | Variables in the Equation |           |       |    |      |        | 95% C.I. for EXP(B) |        |
|---------------------|-----------------|---------------------------|-----------|-------|----|------|--------|---------------------|--------|
|                     |                 | B                         | S.E.      | Wald  | df | Sig. | Exp(B) | Lower               | Upper  |
| Step 1 <sup>a</sup> | SEX(1)          | .734                      | 1.197     | .376  | 1  | .540 | 2.084  | .200                | 21.759 |
|                     | EXPERIENCE(1)   | -1.850                    | 1.195     | 2.399 | 1  | .121 | .157   | .015                | 1.634  |
|                     | SUBSPECIALTY(1) | -.146                     | .869      | .028  | 1  | .866 | .864   | .157                | 4.744  |
|                     | LOCATION(1)     | -2.610                    | 1.223     | 4.555 | 1  | .033 | .074   | .007                | .808   |
|                     | PARENTHSHIP(1)  | -19.823                   | 13879.901 | .000  | 1  | .999 | .000   | .000                | .      |

a. Variable(s) entered on step 1: SEX, EXPERIENCE, SUBSPECIALTY, LOCATION, PARENTHSHIP.

DEPENDENT VARIABLE: ORANGE

INDEPENDENT VARIABLE: SEX, EXPERIENCE, SUBSPECIALTY, LOCATION, PARENTHSHIP

|                     |                 | Variables in the Equation |      |        |    |      |        | 95% C.I. for EXP(B) |       |
|---------------------|-----------------|---------------------------|------|--------|----|------|--------|---------------------|-------|
|                     |                 | B                         | S.E. | Wald   | df | Sig. | Exp(B) | Lower               | Upper |
| Step 1 <sup>a</sup> | SEX(1)          | -1.361                    | .769 | 3.134  | 1  | .077 | .256   | .057                | 1.157 |
|                     | EXPERIENCE(1)   | -1.125                    | .500 | 5.064  | 1  | .024 | .325   | .122                | .865  |
|                     | SUBSPECIALTY(1) | -1.698                    | .399 | 18.126 | 1  | .000 | .183   | .084                | .400  |
|                     | LOCATION(1)     | -.532                     | .407 | 1.715  | 1  | .190 | .587   | .265                | 1.303 |
|                     | PARENTHSHIP(1)  | .433                      | .735 | .347   | 1  | .556 | 1.542  | .365                | 6.515 |

a. Variable(s) entered on step 1: SEX, EXPERIENCE, SUBSPECIALTY, LOCATION, PARENTHSHIP.

DEPENDENT VARIABLE: KIWI OR STRAWBERRY

INDEPENDENT VARIABLE: SEX, EXPERIENCE, SUBSPECIALTY, LOCATION, PARENTHSHIP

|                     |                 | Variables in the Equation |      |        |    |      |        | 95% C.I. for EXP(B) |       |
|---------------------|-----------------|---------------------------|------|--------|----|------|--------|---------------------|-------|
|                     |                 | B                         | S.E. | Wald   | df | Sig. | Exp(B) | Lower               | Upper |
| Step 1 <sup>a</sup> | SEX(1)          | -1.870                    | .755 | 6.142  | 1  | .013 | .154   | .035                | .676  |
|                     | EXPERIENCE(1)   | -.817                     | .395 | 4.274  | 1  | .039 | .442   | .204                | .958  |
|                     | SUBSPECIALTY(1) | -1.226                    | .334 | 13.446 | 1  | .000 | .293   | .152                | .565  |
|                     | LOCATION(1)     | -.021                     | .334 | .004   | 1  | .950 | .979   | .509                | 1.885 |
|                     | PARENTHSHIP(1)  | .251                      | .590 | .181   | 1  | .670 | 1.286  | .404                | 4.089 |

a. Variable(s) entered on step 1: SEX, EXPERIENCE, SUBSPECIALTY, LOCATION, PARENTHSHIP.

**SUPPLEMENTARY TABLE S6**

**Multivariate regression Analysis to evaluate the association of different factors with the time and the waiting period for food introduction of various foods in low- and high-risk children**

DEPENDENT VARIABLE: WAITING PERIOD IN HEALTHY CHILDREN

INDEPENDENT VARIABLE: SEX, EXPERIENCE, SUBSPECIALTY, LOCATION, PARENTHSHIP

|                     |                 | Variables in the Equation |      |       |    |      |        | 95% C.I. for EXP(B) |       |
|---------------------|-----------------|---------------------------|------|-------|----|------|--------|---------------------|-------|
|                     |                 | B                         | S.E. | Wald  | df | Sig. | Exp(B) | Lower               | Upper |
| Step 1 <sup>a</sup> | SEX(1)          | .641                      | .309 | 4.310 | 1  | .038 | 1.898  | 1.036               | 3.475 |
|                     | EXPERIENCE(1)   | -.060                     | .251 | .057  | 1  | .811 | .942   | .576                | 1.540 |
|                     | SUBSPECIALTY(1) | -.224                     | .235 | .906  | 1  | .341 | .799   | .504                | 1.268 |
|                     | LOCATION(1)     | -.029                     | .237 | .015  | 1  | .904 | .972   | .611                | 1.545 |
|                     | PARENTHSHIP(1)  | -.581                     | .407 | 2.035 | 1  | .154 | .560   | .252                | 1.242 |

a. Variable(s) entered on step 1: SEX, EXPERIENCE, SUBSPECIALTY, LOCATION, PARENTHSHIP.

DEPENDENT VARIABLE: WAITING PERIOD IN ALLERGIC CHILDREN

INDEPENDENT VARIABLE: SEX, EXPERIENCE, SUBSPECIALTY, LOCATION, PARENTHSHIP

|                     |                 | Variables in the Equation |      |        |    |      |        | 95% C.I. for EXP(B) |        |
|---------------------|-----------------|---------------------------|------|--------|----|------|--------|---------------------|--------|
|                     |                 | B                         | S.E. | Wald   | df | Sig. | Exp(B) | Lower               | Upper  |
| Step 1 <sup>a</sup> | SEX(1)          | .314                      | .463 | .460   | 1  | .498 | 1.369  | .552                | 3.391  |
|                     | EXPERIENCE(1)   | .254                      | .358 | .502   | 1  | .479 | 1.289  | .639                | 2.599  |
|                     | SUBSPECIALTY(1) | 1.777                     | .336 | 27.896 | 1  | .000 | 5.913  | 3.058               | 11.435 |
|                     | LOCATION(1)     | 1.066                     | .345 | 9.571  | 1  | .002 | 2.904  | 1.478               | 5.705  |
|                     | PARENTHSHIP(1)  | -.841                     | .527 | 2.542  | 1  | .111 | .431   | .153                | 1.213  |

a. Variable(s) entered on step 1: SEX, EXPERIENCE, SUBSPECIALTY, LOCATION, PARENTHSHIP.



# QUESTIONNAIRE

## Personal Information

1. Sex

male ☐

female ☐

2. Year of birth

3. Year of graduation from pediatric specialty

4. Years of work as a pediatrician

5. Do you have a subspecialty of pediatrics? if Yes please name

6. Place of work (name City/Town and Hospital, University, own practice etc)

7. Number of children

## Complementary feeding order

[This section of the online questionnaire displayed a multi-part **ordering/ranking activity** where users could select from the following items and “place” them in the appropriate month (Birth – Month 18)]

### STARCHY / WHEAT

Brown rice (including brown rice flour)

Frumenty

Grains from white flour e.g. Pasta, pastries, etc. from white flour

Oat

Oat (gluten free)

Potato

White rice (including white rice flour)

Whole grains (wheat, barley, rye) e.g. Pasta, pastries, etc

### MILK / DAIRY

Anthotyro/manouri cheese  
Ariani  
Cottage cheese  
Cow's milk yogurt  
Cream cheese (Katiki Domokou)  
Drained yogurt  
Feta cheese  
Fresh cow's milk  
Fruit yogurt  
Goat's milk yogurt  
Gouda cheese  
Hard type cheese eg kaseri/graviera/kefalotyri  
Kefir  
Kid's yogurt  
Philadelphia cream cheese  
Sheep yogurt  
Traditional yogurt with skin

## FRUIT

Apple  
Apricot  
Banana  
Cherries  
Dried apricots  
Dried berries  
Dried figs  
Dried plums  
Figs  
Fresh berries  
Fresh fruit mixture  
Fresh orange juice  
Grapes  
Kiwi  
Mantarine  
Melon  
Orange  
Peach/nectarine  
Pear  
Pomegranate  
Raisins  
Strawberries  
Watermelon

## VEGETABLES

Aubergine  
Beetroot  
Broccoli

Cabbage  
Carrot  
Cauliflower  
Corn  
Green leafy vegetables  
Pea  
Pepper  
Spinach  
Tomato  
Zucchini

#### **MEAT / MEAT PRODUCTS**

Chicken  
Cold cuts/Ham/Salami  
Game meat - birds (thrush, snipe, partridge, etc.)  
Game meat - rabbit, hare, boar  
Lamb  
Liver  
Pork  
Rabbit  
Veal

#### **FISH / SHELLFISH**

Anchovy  
Calamari  
Clams  
Cod  
Codfish  
Octopus  
Salmon  
Sardines  
Sea bream/bass  
Shrimps  
Sole  
Tuna fish (can)

#### **EGG**

Egg omelet/egg eye  
Egg with lemon  
Hard boiled egg (boiling >6min)  
Raw egg

#### **LEGUMES**

Beans (all types)  
Chickpeas  
Fava  
Lentils

#### **OILS / LIPIDS**

Butter

Corn oil/vegetable oils  
Margarine  
Olive oil  
Olives  
Whipping cream

#### **NUTS**

Almond paste  
Almonds  
Cashews  
Hazelnut  
Hazelnut butter  
Peanut  
Peanut butter  
Pistacchio  
Sesame  
Sunflower/pumpkin seed  
Tachini  
Walnuts

#### **SUGAR /SWEETENERS / HONEY**

Baby biscuits with sugar  
Baby biscuits without sugar  
Honey  
Sugar/sweets with sugar

#### **FOOD SUPPLEMENTS**

Iron  
Multivitamin  
Omega-3  
Probiotic  
Vitamin A  
Vitamin C  
Vitamin D

#### **COOKING INSTRUCTIONS**

Salt  
Spices (eg pepper, cinammon, etc)  
Boiled  
Frying  
Roasted  
Family food with salt  
Family food without salt  
Mashed food  
Fork mashed food  
Food in pieces  
Ready meal in jar

## Additional questions

1. What is the interval between the introduction of one food and the next in a healthy child?

- 1-2 days ☒
- 2-3 days ☐
- 3-4 days ☐
- 4-5 days ☐
- 5-6 days ☐
- 6-7 days ☐

2. What is the interval between the introduction of one food and the next in an allergic child?

- 1-2 days ☐
- 2-3 days ☐
- 3-4 days ☐
- 4-5 days ☐
- 5-6 days ☐
- 6-7 days ☐

3. Please select for which of the following foods you delay the introduction, if the child is allergic:

Kiwi Fruit ☐

Egg ☐

Cow's milk ☐

Yoghurt ☐

Grains (gluten products) ☐

Nuts ☐

Orange ☐

Strawberries ☐

Peanuts ☐

Fish ☐

Other ☐

4. What factors make you vary the general food order guideline you described (eg neurodevelopmental factors)?

[freetext]

Comments

[freetext]
